# Supplementary material for: Long-range PCR and Nanopore sequencing for localisation and phasing variants: an end-to-end clinical application workflow
Source: Research Square preprint supplement (doi:10.21203/rs.3.rs-7242084/v1), 2025-08-08
Supplement: Supplementary file 1 [file 6a2596b42b827c3d05a1a813.docx]

**Supplementary materials**

**Long-range PCR and Nanopore sequencing for localisation and phasing variants: an end-to-end clinical application workflow**

Javad Jamshidi1,2,3*, Conor Rowntree1,2,3, Shannon Fadaee3, Futao Zhang1,3, Ying Zhu1,3,4, Michael Buckley2,3, Franki Hart3, Tony Roscioli1,2,3*

1 Neuroscience Research Australia, Sydney, New South Wales, Australia.

2 Prince of Wales Clinical School, Faculty of Medicine, University of New South Wales, Sydney, New South Wales, Australia.

3 New South Wales Health Pathology Randwick Genomics, Prince of Wales Hospital, Sydney, New South Wales, Australia

4 Kolling Institute, Faculty of Medicine and Health, University of Sydney, Sydney, New South Wales, Australia

* Corresponding authors:

Javad Jamshidi, j.jamshidi@neura.edu.au

Tony Roscioli, tony.roscioli@health.nsw.gov.au

**Table of Contents**

[Long-range PCR kit comparison 3](#_Toc204679791)

[Table S1: Details of Long Read Sequencing PCR kits 3](#_Toc204679792)

[**PCR Targets** 3](#_Toc204679793)

[Table S2: Details of Long Read Sequencing PCR primers 3](#_Toc204679794)

[**PCR setup** 3](#_Toc204679795)

[Table S3: Details of Long-range PCR protocols for different PCR kits 4](#_Toc204679796)

[**DNA input** 4](#_Toc204679797)

[**Post-PCR Analysis** 4](#_Toc204679798)

[**Results:** 5](#_Toc204679799)

[**Long-range PCR kit comparison** 5](#_Toc204679800)

[Table S4: Platinum SuperFi II PCR Master Mix (2X) amplification result 5](#_Toc204679801)

[Table S5: LongAmp® Taq 2X Master Mix amplification result 5](#_Toc204679802)

[Table S6: Q5® Hot Start High-Fidelity 2X Master Mix amplification result 6](#_Toc204679803)

[Table S7: UltraRun LongRange PCR Kit amplification result 6](#_Toc204679804)

[**Input DNA variation:** 7](#_Toc204679805)

[Table S8: UltraRun LongRange PCR Kit performance with 150ng and 100ng DNA 7](#_Toc204679806)

[**Selected PCR setup and protocol:** 8](#_Toc204679807)

[Nanopore library preparation and sequencing 9](#_Toc204679808)

[**Rational for selection of Flongle flow cells** 9](#_Toc204679809)

[**The protocol for multiplexing amplicons on Flongle flow cells** 9](#_Toc204679810)

[**Testing and the protocol with multiplexing 8 amplicons** 10](#_Toc204679811)

[Table S9: Amplicons and sequencing details of the 8x multiplex test. 10](#_Toc204679812)

[Table S10. Details of the primers, amplicons and targeted variants selected for phasing. 11](#_Toc204679813)

[Table S11. Selected genes with low-mappability regions in WES with their associated phenotype and reason for low-mappability 12](#_Toc204679814)

[Table S12: Primer and amplicon specifications for low-mappability genes 13](#_Toc204679815)

[Table S13: Sequencing details of the amplicons generated using Platinum SuperFi II PCR Master Mix 13](#_Toc204679816)

[Table S14: Sequencing details of the amplicons generated using UltraRun LongRange PCR Kit with 28-cycle PCR 13](#_Toc204679817)

[Table S15: Sequencing outcomes for the low mappability genes 14](#_Toc204679818)

[Tale S16: Comparison of the correct phase with the phase determined by the bioinformatic pipeline for indels 14](#_Toc204679819)

[Table S17: Comparison of chimeric reads across three different PCR conditions 14](#_Toc204679820)

[Evaluating the relevance of the phasing test with 20kb limit 15](#_Toc204679821)

[Figure S1. Gene lengths distribution (left) in the database of 5,678 genes associated with Mendelian disorders and the phasing test usefulness by gene lengths (right). 15](#_Toc204679822)

# Long-range PCR kit comparison

Four different long-range PCR kits were selected for assessment.

Table S1 summarises the details of the PCR kits used in our experiments.

### Table S1: Details of Long Read Sequencing PCR kits

| PCR Kit | Manufacturer | cat. Number | Product length | Fidelity (vs. Taq) |
| --- | --- | --- | --- | --- |
| Platinum SuperFi II PCR Master Mix (2X) | Invitrogen | 12368010 | <20 kb | 300X |
| LongAmp® Taq 2X Master Mix | New England Biolabs | M0287S | <30 kb | 2X |
| Q5® Hot Start High-Fidelity 2X Master Mix | New England Biolabs | M0494S | <20 kb | 280X |
| UltraRun LongRange PCR Kit | Qiagen | 206442 | <30 kb | 10X |

## ***PCR Targets***

Ten DNA regions were chosen for amplification, with each region contained at least one gene, and that each amplicon spanned a minimum of two exons. This was to simulate the intended application of these amplicons in a diagnostic setting. The amplicons ranged from 1 to 22 kb. One amplicon was at approximately 22 kb, 10% longer than the base target size, to assess whether the kit could amplify regions slightly exceeding 20 kb. Primers for these regions were designed using NCBI primer blast. The primers’ sequence and the details of amplicons are provided in table S2 below.

### Table S2: Details of Long Read Sequencing PCR primers

| Amplicon ID | Primer (Forward, Reverse) | Amplicon hg38 coordination | Gene(s) | Amplicon size (bp) |
| --- | --- | --- | --- | --- |
| A1 | CTGCCATCTTCAATTAAAGGAACC AAGCTTACTTGTCAGAATGTTAGTC | chr2:209944746-209946062 | *UNC80* | 1,317 |
| A2 | CTGAGAGCCACATCCAGGTC ACAGTTCCAAGTCCACCCAC | chr2:178553165-178560615 | *TTN-AS1* | 7,125 |
| A3 | CCTGAGGAGTGATGGGCAAG TTCAGCCAAGGGCATCTGAC | chr1:154576194-154586009 | *CHRNB2, ADAR* | 9,625 |
| A4 | ATACTCTGAGAAGAGGGAGGTAGGG  GGCACTCCTGATGTGTACTTGCTTTG | chr6:152389564-152404726 | *SYNE1* | 15,163 |
| A5 | AGGAAGGAACACGGGTAGATGATG TTCTGTCTCCACTCTTCCCTCTAGC | chr1:236544386-236560469 | *LGALS8, HEATR1* | 16,084 |
| A6 | CCTGGGCTAGGAGATTGAGAGAGAATC GGAATCAGTAGCCACAGGGATAACAG | chr1:43655287-43672123 | *KDM4A* | 16,837 |
| A7 | AAAGGGATCCGTGAGTGGAGAGTG CGATGGAGTTACGGCCGAATAAGC | chr1:6629338-6647434 | *THAP3, DNAJC11* | 18,097 |
| A8 | GTCACATTTGGGCCACAGAAATGG  AATAGGGACAGGGTTTCTGGAGTG | chr4:3427352-3446507 | *RGS12* | 19,156 |
| A9 | CATCCATCCGGTGAACCATCATAGAG  GATTCTGTGGAAGGCAGGTTAGGAG | chr10:71360819-71381764 | *SLC29A3* | 20,946 |
| A10 | GTAACGGTGAAGGGAGACATTAGG TATGGCTGGTGATAGAGGCTTGTC | chrX:32463362-32485266 | *DMD* | 21,905 |

## ***PCR setup***

PCR programs were configured according to the manufacturer’s recommendations for each kit. However, as this long-range PCR protocol was developed to be used for standardised diagnostic laboratory implementation, a single PCR program using a single annealing temperature and extension time was established for each kit to enable one set of conditions for all samples to be amplified simultaneously on a thermal cycler. Platinum SuperFi II and UltraRun LongRange PCR Kits have universal recommended annealing temperatures of 60°C and 65°C, respectively, which were adopted for long read sequencing PCR. For LongAmp® Taq and Q5® Hot Start High-Fidelity kits, an average annealing temperature (calculated based on each kit recommendations) was used for all amplicons, which was 59°C and 69°C, respectively. The extension time for each kit was set according to the longest amplicon, ensuring all target regions were adequately amplified.

PCR cycle number was set to 26 to reduce chimeric reads (Laver et al., 2016). All PCRs were conducted in a final volume of 20 µl, using 150 ng of the same DNA sample (NA24385) and 0.5 µM of each forward and reverse primer. The same thermal cycler was used for all tests to ensure consistency. The detailed PCR protocols for each kit are presented in table S3 below. Note that the annealing and extension temperature for UltraRun LongRange PCR kit were the same, therefore it was run as two-step PCR.

### Table S3: Details of Long-range PCR protocols for different PCR kits

| PCR Kit | Annealing Temp °C | Extension temp °C | Extension time (minutes) |
| --- | --- | --- | --- |
| Platinum™ SuperFi II | 60 | 72 | 11.5 |
| Q5® Hot Start High-Fidelity | 69 | 72 | 16 |
| UltraRun LongRange* | 65 | 65 | 11.5 |
| LongAmp® Taq | 59 | 65 | 20 |

*two-step PCR

## ***DNA input***

As some studies in the literature have used lower DNA input for long-range PCR (McClinton et al., 2023), the PCR kit with the best performance was further assessed with a reduction of the DNA input from 150 ng to 100 ng.

## ***Post-PCR Analysis***

After PCR, the amplicons were analysed using Agilent 4200 Tape Station System. Each PCR product was evaluated based on three criteria:

1. Presence of the specific amplicon
2. Concentration of the specific amplicon
3. Presence of any additional amplicons or non-specific bands

Gel images were examined to identify the specific bands and detect any non-specific bands. The Tape Station data was exported as CSV files, providing detailed information for each sample, including the concentration and size of all bands. A successful amplicon was defined as the presence of a clear band in the gel image, with the specific band's concentration >2 ng/µl. Non-specific bands were defined as any additional bands other than the specific one, with a concentration >2 ng/µl.

## **Results:**

## **Long-range PCR kit comparison**

The details of amplification success using different PCR kits are presented in tables S4-S7:

### Table S4: Platinum SuperFi II PCR Master Mix (2X) amplification result

| Amplicon ID | Amplicon size (bp) | Amplicon concentration (ng/µl) | Non-specific bands | Success |
| --- | --- | --- | --- | --- |
| A1 | 1,317 | 97.64 | NO | YES |
| A2 | 7,125 | 34.7 | NO | YES |
| A3 | 9,625 | 22 | NO | YES |
| A4 | 15,163 | 2.06 | NO | YES |
| A5 | 16,084 | 7.18 | NO | YES |
| A6 | 16,837 | 2.42 | NO | YES |
| A7 | 18,097 | . | . | NO |
| A8 | 19,156 | 2 | NO | YES |
| A9 | 20,946 | . | . | NO |
| A10 | 21,905 | . | . | NO |

Seven out of ten amplicons were successfully amplified (70% success rate), with no non-specific bands observed in any of the amplicons. Amplification failed for the two longest amplicons, and three of the successful amplicons showed very low concentrations.

### Table S5: LongAmp® Taq 2X Master Mix amplification result

| Identifier | Amplicon size (bp) | Amplicon concentration (ng/µl) | Non-specific bands | Success |
| --- | --- | --- | --- | --- |
| A1 | 1,317 | 108 | YES | YES |
| A2 | 7,125 | 9.05 | NO | YES |
| A3 | 9,625 | 31 | YES | YES |
| A4 | 15,163 | 22.5 | NO | YES |
| A5 | 16,084 | 14.3 | NO | YES |
| A6 | 16,837 | 12.2 | NO | YES |
| A7 | 18,097 | . | . | NO |
| A8 | 19,156 | . | . | NO |
| A9 | 20,946 | . | . | NO |
| A10 | 21,905 | 51 | YES | YES |

Seven out of ten amplicons were successfully amplified (70% success rate). However, three of the successful amplicons displayed non-specific bands. The amplification was successful for the longest amplicon but failed for two other amplicons with increased length.

### Table S6: Q5® Hot Start High-Fidelity 2X Master Mix amplification result

| Identifier | Amplicon size (bp) | Amplicon concentration (ng/µl) | Non-specific bands | Success |
| --- | --- | --- | --- | --- |
| A1 | 1,317 | 12 | NO | YES |
| A2 | 7,125 | 17.6 | NO | YES |
| A3 | 9,625 | 52.8 | YES | YES |
| A4 | 15,163 | . | . | NO |
| A5 | 16,084 | 2 | NO | YES |
| A6 | 16,837 | . | . | NO |
| A7 | 18,097 | . | . | NO |
| A8 | 19,156 | . | . | NO |
| A9 | 20,946 | . | . | NO |
| A10 | 21,905 | . | . | NO |

Q5® Hot Start High-Fidelity showed the poorest performance, with only 4 out of 10 amplicons successfully amplified (40% success rate). All successful amplicons were of shorter length. The low success rate for this kit may be attributed to its sensitivity to annealing temperature, as the same annealing temperature was used for all amplicons.

### Table S7: UltraRun LongRange PCR Kit amplification result

| Identifier | Amplicon size (bp) | Amplicon concentration (ng/µl) | Non-specific bands | Success |
| --- | --- | --- | --- | --- |
| A1 | 1,317 | 37.8 | NO | YES |
| A2 | 7,125 | 104 | NO | YES |
| A3 | 9,625 | 51.10 | NO | YES |
| A4 | 15,163 | 40.2 | NO | YES |
| A5 | 16,084 | 43.4 | NO | YES |
| A6 | 16,837 | 31.4 | NO | YES |
| A7 | 18,097 | 10.3 | NO | YES |
| A8 | 19,156 | 6.89 | NO | YES |
| A9 | 20,946 | . | . | NO |
| A10 | 21,905 | 3.08 | NO | YES |

The UltraRun LongRange PCR Kit demonstrated the best performance, successfully amplifying 9 out of 10 amplicons (90% success rate). The only amplicon that failed also did not amplify with the other kits. The concentrations of the successful amplicons were satisfactory, and no non-specific bands were observed in these amplifications.

## ***Input DNA variation:***

Table S8 summarises the performance of the UltraRun LongRange PCR Kit using 150 ng versus 100 ng of DNA input, while keeping all other variables constant across the 10 PCR targets.

### Table S8: UltraRun LongRange PCR Kit performance with 150ng and 100ng DNA

| Identifier | Amplicon size (bp) | Amplicon concentration (ng/µl) | Non-specific bands | Success | Amplicon concentration (ng/µl) | Non-specific bands | Success |
| --- | --- | --- | --- | --- | --- | --- | --- |
| 150 ng DNA | | | 100 ng DNA | | |
| A1 | 1,317 | 37.8 | NO | YES | 42.1 | NO | YES |
| A2 | 7,125 | 104 | NO | YES | 56.8 | NO | YES |
| A3 | 9,625 | 51.10 | NO | YES | 21.00 | NO | YES |
| A4 | 15,163 | 40.2 | NO | YES | 9.85 | NO | YES |
| A5 | 16,084 | 43.4 | NO | YES | *6.62* | NO | YES |
| A6 | 16,837 | 31.4 | NO | YES | 8.7 | NO | YES |
| A7 | 18,097 | 10.3 | NO | YES | 4 | NO | YES |
| A8 | 19,156 | 6.89 | NO | YES | . | . | NO |
| A9 | 20,946 | . | . | NO | . | . | NO |
| A10 | 21,905 | 3.08 | NO | YES | . | . | NO |

Reducing the DNA input had a negative impact on PCR performance. The overall yield decreased, leading to amplification failure for two long targets and reduction of success rate from 90% to 70%. As a result, 150 ng of DNA input was selected for further validation tests.

In summary, these experiments demonstrated that the UltraRun LongRange PCR Kit outperforms other comparable PCR kits tested here, with a higher success rate for amplifying long targets. In addition to its higher success rate, UltraRun LongRange PCR Kit yields higher product concentrations and fewer non-specific bands compared to the other kits. Based on these results, UltraRun LongRange PCR Kit with 150 ng DNA in a 20ul PCR reaction was selected for further tests and sequencing in this study.

##

## **Selected PCR setup and protocol:**

**PCR setup:**

| Component | Final concentration | 20-µL reaction |
| --- | --- | --- |
| UltraRun LongRange PCR Master Mix 4x | 1X | 5 µL |
| Forward & Reverse primers | 0.5 µM | *2* µL (of 5 µM mixed primers) |
| Template DNA | 7.5 ng/µl | 150ng |
| Q-Solution (if needed) | 1X | 4 µL |
| Nuclease-free Water | — | Up to 20 µL |

**PCR protocol:**

| Cycle step | Temperature | Time | Cycles |
| --- | --- | --- | --- |
| Initial denaturation | 93°C | 3 minutes | 1 |
| Denaturation | 93°C | 35 seconds | 26 |
| Annealing/Extension | 65°C | 11 minutes and 30 sec |
| Final extension | 72°C | 10 minutes | 1 |
| Hold | 4°C | Infinitive |  |

# Nanopore library preparation and sequencing

## **Rational for selection of Flongle flow cells**

Oxford Nanopore Technologies offers three types of flow cells: Flongle, MinION, and PromethION, each differing in the number of nanopores and, consequently, their sequencing output capacity. Flongle is the smallest, with a theoretical output of up to 2.6 Gb (gigabases). MinION has a theoretical output of up to 48 Gb, while PromethION, the largest, offers a theoretical output of up to 290 Gb. A minimum depth of ~50× spanning reads with QMAP >20 was determined to be sufficient to phase variants or localise variants in low-mappability regions. Therefore, the most suitable flow cell for such applications is the Flongle, as it provides sufficient data - even when multiplexing amplicons - while significantly reducing costs. While MinION could also be used, achieving similar cost efficiency would require multiplexing far more samples per flow cell, which would result in impractically long turnaround times, as such tests are infrequent and would take considerable time for enough samples to accumulate for multiplexing.

## **The protocol for multiplexing amplicons on Flongle flow cells**

The protocol designed for barcoding genomic DNA on Flongle (Ligation Sequencing gDNA - Native Barcoding Kit 24 V14, SQK-NBD114.24, Version: NBE_9169_v114_revR_15Sep2022) was adapted for use. Modifications were made to the DNA repair and end-prep steps to accommodate the use of amplicons.

The section below highlights modifications made to the original protocol. Changes are indicated by underlining additions and striking through removed steps. Only the following steps were altered; all other parts of the protocol remain unchanged.

-------------------------------------------------------------------------------------------------------------------

**DNA repair and end-prep:**

4. In clean 0.2 ml thin-walled 8-strip PCR tubes (or a clean 96-well plate), prepare your DNA samples:

~~For >4 barcodes, aliquot 400 ng per sample~~

~~For ≤4 barcodes, aliquot 1000 ng per sample~~

5. ~~Make up each sample to 11 μl using nuclease-free water.~~ Add 5-10 femtomole of each PCR products to each tube and make up each sample to 18.4 μl by adding nuclease-free water. Mix gently by pipetting and spin down.

6. Combine the following components per tube/well:

- ~~11 μl DNA sample~~ 18.4 μl sample
- ~~1 μl Diluted DNA Control Sample (DCS)~~
- ~~0.875 μl NEBNext FFPE DNA Repair Buffer~~
- 0.875 μl Ultra II End-prep Reaction Buffer
- 0.75 μl Ultra II End-prep Enzyme Mix
- ~~0.5 μl NEBNext FFPE DNA Repair Mix~~
- ~~15~~ 20 μl Total

~~9. Transfer each sample into a clean 1.5 ml Eppendorf DNA LoBind tube.~~

11. Add ~~15~~ 20 μl of resuspended AMPure XP Beads (AXP) to each end-prep reaction and mix by flicking the tube.

-------------------------------------------------------------------------------------------------------------------

The rest of the protocol remains the same.

## **Testing and the protocol with multiplexing 8 amplicons**

To test the protocol four longer amplicons were used, running each one in duplicate with different input amounts. This design allowed a comparison of how sequencing coverage varied when the same amplicon was run at different DNA concentrations during 8x multiplexing on a Flongle flow cell. Table S9 summarises the experimental setup and results.

### Table S9: Amplicons and sequencing details of the 8x multiplex test.

| Flow cell ID | Available Pores | Amplicon Identifier | Barcode | Amplicon size | Input (fmole) | Library loaded (fmole) | Total bases (Mb)1 | Total reads (k)1 | On target reads 3 | HQ Spanning reads4 |
| --- | --- | --- | --- | --- | --- | --- | --- | --- | --- | --- |
| AUB559 | 67 | B10 | 1 | 22409 | 5.4 | 11 | 40 | 6.10 | 1030 | 286 |
| B3 | 2 | 11521 | 11.4 | 41 | 5.6 | 2255 | 1748 |
| A4 | 3 | 15163 | 9.9 | 78 | 7.4 | 4580 | 3587 |
| A5 | 4 | *16084* | 6.0 | *54* | *5* | *2401* | *1320* |
| B10 | 5 | 22409 | 9.0 | 94 | 12.60 | 3217 | 1010 |
| B3 | 6 | 11521 | 11.7 | 62 | 8.6 | 2030 | 1644 |
| A4 | 7 | 15163 | 9.8 | 58 | 6 | 4218 | 2331 |
| A5 | 8 | *16084* | 10.9 | *77* | *7.3* | *5939* | *3004* |

**1 Total bases (Mb)**: The total number of bases sequenced for the specified barcode, measured in mega bases.

**2 Total reads (K)**: The total number of DNA strands (reads) sequenced for the specified barcode, measured in thousands.

**3 On-target reads**: The total number of reads mapped to the coordinates of the amplicon.

**4 HQ Spanning reads**: High quality reads (MapQ >20) that span both variants of interest (i.e., variants to be phased). The variants are typically located at opposite ends of the read or if the amplification is for variant localisation, this number is the minimum depth of variants of interest in the amplicon.

The results showed a direct correlation between input DNA amount and sequencing depth. Using the longest amplicon (B10, 22,409 bp), 9 femtomole input, yielded more than 1000 spanning high quality reads. Even with just 5.4 femtomoles of input, it was feasible to achieve 286 spanning high-quality reads for the longest amplicon when multiplexing eight amplicons on a Flongle flow cell. While using equimolar amounts of each amplicon would be ideal for optimal results, this may not always be feasible, as the yield from some PCR reactions may fall below the optimal range of 5–10 femtomoles.

### Table S10. Details of the primers, amplicons and targeted variants selected for phasing.

| Amplicon ID | Primers (Forward, Reverse) | Amplicon size (bp) | Amplicon coordinate (hg38) | Variants | Distance between variants | Gene(s) |
| --- | --- | --- | --- | --- | --- | --- |
| B1* | AAAAGAGGCGCAGGGTAGAG ATCAGGGTGCAGAGGTGTTC | 8743 | chr16:88643154-88651896 | chr16:886,433,29 C>T  chr16:886,501,26 A>G | 6797 | *CYBA* |
| B2 | AAAGCAGTTCAAGGTCGACAGAGG GGGAAGGGGTGTAACATTAGATGGAG | 10026 | chr12:8927005-8937030 | chr12:8,927,591 T>C  chr12:8,936,676 A>C | 9085 | *PHC1* |
| B3 | CTTAGGGTTGGGCCGCTTG GAGAGTCTGCACCATTAGAGTTTGC | 11521 | chr12:6933739-6945259 | chr12:6,936,914 G>A  chr12:6,944,269 C>T | 7355 | *ATN1, C12orf57* |
| B4 | CTTCCGGTGACTATCGCAGAG AATGAGGTTGAACAGAGTCCAGC | 13789 | chr4:41638213-41652001 | chr4:41,638,861 C>T  chr4:41,651,881 G>A | 13020 | *LIMCH1* |
| B5 | CTCACAGCTCATCCACTATTGCTC  CCTGGGTCTGACTTGTTGTAATGG | 14391 | chr3:49412078-49426468 | chr3:49,412,205 G>A  chr3:49,425,854 G>A | 13649 | *TCTA, AMT, NICN1* |
| B6 | GATCAAGCCAGCAAATGTTTCCCC CAGGTCAGTTCAATTCGCCACC | 14466 | chr21:42375008-42389474 | chr21:42,375,588 G>A  chr21:42,388,818 A>G | 13230 | *TMPRSS3* |
| B7 | ATACCATCCAGTCACCACTTATGC GACAGGGACGCAATTTCAATACAG | 17828 | chr21:42371349-42389177 | chr21:42,372,760 C>T  chr21:42,387,895 A>C | 15135 | *TMPRSS3* |
| B8 | CACTGCATGGCAATCCTCATCTG TCAGCCTCTGATCCTCGATCTTTC | 21530 | chr3:48566061-48587591 | chr3:48,566,437 G>A  chr3:48,584,160 T>C | 17723 | *Col7A1* |
| B9 | CCTGTGGAACACAAGTCTAGCATC AAGGATCCAGAGGTTGGAACAAGG | 22097 | chr9:130404071-130426167 | chr9:130,407,156 A>G  chr9:130,426,008 C>T | 18852 | *HMCN2* |
| B10 | CCCCACCATATACCAAACACTCCAC ATGTCTATACTCCCAGGGCCATTC | 22409 | chr1:236010990-236033398 | chr1:236,011,853 T>C  chr1:236,033,263 A>G | 21410 | *NID1* |

*Required Q solution

### Table S11. Selected genes with low-mappability regions in WES with their associated phenotype and reason for low-mappability

| Gene Symbol | Phenotype | Phenotype MIM number | Inheritance | Gene size (bp) | Reason for low mappability |
| --- | --- | --- | --- | --- | --- |
| *TUBB2A* | Cortical dysplasia, complex, with other brain malformations 5 | 615763 | AD | 3879 | Paralog (TUBB2B) and Pseudogene (TUBB2BP1) |
| *TUBB2B* | Cortical dysplasia, complex, with other brain malformations 7 | 610031 | AD | 3377 | Paralog (TUBB2A) and Pseudogene (TUBB2BP1) |
| *CYP11B1* | Adrenal hyperplasia, congenital, due to 11-beta-hydroxylase deficiency  Aldosteronism, glucocorticoid-remediable | 202010  103900 | AR  AD | 7469 | Paralog gene (CYP11B2) |
| *SBDS* | Shwachman-Diamond syndrome 1 | 260400 | AR | 7907 | Pseudogene (SBDSP1) |
| *HBA1* | Erythrocytosis, familial, 7  Heinz body anemias, alpha-  Hemoglobin H disease, nondeletional  Methemoglobinemia, alpha type  Thalassemias, alpha- | 617981  140700  613978  617973  604131 | AD | 843 | Paralog (HBA2) and Pseudogene (HBAP1) |
| *HBA2* | Erythrocytosis, familial, 7  Heinz body anemia  Hemoglobin H disease, deletional and nondeletional  Thalassemia, alpha- | 617981  140700  613978  617973  604131 | AD | 853 | Paralog (HBA1) and Pseudogene (HBAP1) |
| *RBMX* | ?Intellectual developmental disorder, X-linked syndromic, Gustavson type  ?Intellectual developmental disorder, X-linked syndromic, Shashi type | 309555  300238 | XLR | 7265 | Paralogs (RBMX2, RBMXL, and more) and Pseudogenes (RBMXP1, RBMXP1 and more) |
| *CEL* | Maturity-onset diabetes of the young, type VIII | 609812 | AD | 9881 | Pseudogene (CELP) |

### Table S12: Primer and amplicon specifications for low-mappability genes

| Amplicon ID | Gene(s) | Primers (forward, reverse) | Amplicon size | Amplicon coordinates (GRCh38) |
| --- | --- | --- | --- | --- |
| TUBB2A | *TUBB2A* | AGGGGCAGGTTTGCTTTACC AGGGTACTCGACGCCTCTTC | 4599 | chr6:3153384-3157982 |
| TUBB2B* | *TUBB2B* | CCACACGTCCAGTATGCCAA  GCTTCTCCACATGCTCCAGTC | 5448 | chr6:3222614-3228061 |
| HBA* | *HBA1* & *HBA2* | ATGCTGAGGGAACACAGCTAC TCTGGTGTGTGAGCATTCTGG | 7117 | chr16:170976-178092 |
| CYP | *CYP11B1* | CAACACTCACACACCTTCACC AGTCCTTTTCCCCTGTCTACG | 9512 | chr8:142870484-142879995 |
| CEL | *CEL* | ACAACCTCACACGACCTTCTC CGAACCCAGACTTTCAGCATAG | 11394 | chr9:133061259-133072652 |
| RBMX | *RBMX* | GAAAGCATACCATACTCGGCAAC CCACTAGGACGCTCAATAAACTTCAG | 13079 | chrX:136867961-136881039 |
| SBD | *SBDS* | TGGCAGATAGATGCCTAAAGAGC ACTCCACTTACCTGCGTCTTG | 15625 | chr7:66982582-66998206 |

*Required Q solution

### Table S13: Sequencing details of the amplicons generated using Platinum SuperFi II PCR Master Mix

| Amplicon ID | Amplicon Size | Variant1 (hg38) | Variant2 (hg38) | Distance between variants (bp) | HQ spanning reads | Chimeric reads % | Phase |
| --- | --- | --- | --- | --- | --- | --- | --- |
| A3 | 9625 | chr1:154,579,450 C>T | chr1:154,585,209 C>T | 5759 | 7489 | 9.48 | cis |
| B2 | 10026 | chr12:8,927,591 T>C | chr12:8,936,676 A>C | 9085 | 21701 | 27.1 | trans |
| B3 | 11521 | chr12:6,936,914 G>A | chr12:6,944,269 C>T | 7355 | 3792 | 9.97 | cis |
| B4 | 13789 | chr4:41,651,881 G>A | chr4:41,638,861 C>T | 13020 | 11815 | 11 | cis |
| B5 | 14391 | chr3:49,412,205 G>A | chr3:49,425,854 G>A | 13649 | 1633 | 8.57 | cis |
| A5 | 16084 | chr1:236,544,737 T>C | chr1:236,559,878 C>A | 15141 | 524 | 8.78 | trans |
| A6 | 16837 | chr1:43658540 G>T | chr1:43667233 A>G | 8693 | 469 | 2.13 | cis |
| B8 | 21530 | chr3:48,566,437 G>A | chr3:48,584,160 T>C | 17723 | 229 | 9.17 | cis |

### Table S14: Sequencing details of the amplicons generated using UltraRun LongRange PCR Kit with 28-cycle PCR

| Amplicon ID | Amplicon Size | Variant1 (hg38) | Variant2 (hg38) | Distance between variants (bp) | HQ spanning reads | Chimeric reads % | Phase |
| --- | --- | --- | --- | --- | --- | --- | --- |
| A3 | 9625 | chr1:154,579,450 C>T | chr1:154,585,209 C>T | 5759 | 13577 | 7.81 | cis |
| B2 | 10026 | chr12:8,927,591 T>C | chr12:8,936,676 A>C | 9085 | 16115 | 22.72 | trans |
| B3 | 11521 | chr12:6,936,914 G>A | chr12:6,944,269 C>T | 7355 | 1644 | 2.86 | cis |
| B4 | 13789 | chr4:41,638,861 C>T | chr4:41,651,881 G>A | 13020 | 115 | 2.30 | cis |
| B5 | 14391 | chr3:49,412,205 G>A | chr3:49,425,854 G>A | 13649 | 3949 | 2.82 | cis |
| A5 | 16084 | chr1:236,544,737 T>C | chr1:236,559,878 C>A | 15141 | 3004 | 18.34 | trans |
| A6 | 16837 | chr1:43658540 G>T | chr1:43667233 A>G | 8693 | 3992 | 5.30 | cis |
| B8 | 21530 | chr3:48,566,437 G>A | chr3:48,584,160 T>C | 17723 | 3492 | 9.77 | cis |

### Table S15: Sequencing outcomes for the low mappability genes

| Amplicon ID | Gene(s) | Amplicon size | Total reads (n) | High quality reads minimum depth1 (x) | High quality reads maximum depth2 (x) | High quality reads median depth3 (x) |
| --- | --- | --- | --- | --- | --- | --- |
| CYP | *CYP11B1* | 9512 | 4927 | 3323 | 4273 | 3790 |
| SBD | *SBDS* | 15625 | 3764 | 534 | 2110 | 1031 |
| HBA | *HBA1* & *HBA2* | 7117 | 3236 | 1462 | 2627 | 2440 |
| TUBB2A | *TUBB2A* | 4599 | 10562 | 6728 | 8080 | 7814 |
| TUBB2B | *TUBB2B* | 5448 | 22419 | 6782 | 8129 | 7877 |
| RBMX | *RBMX* | 13079 | 16599 | 6629 | 8270 | 7463 |

High quality reads is defined as reads with lengths >1kb, read identity > 80% and QMAP > 20

1 High quality reads minimum depth (x): The minimum depth of sequencing for bases throughout the sequenced amplicon after QC

2 High quality reads maximum depth (x): The maximum depth of sequencing for bases throughout the sequenced amplicon after QC

3 High quality reads median depth (x): The median depth of all bases throughout the sequenced amplicon after QC

### Tale S16: Comparison of the correct phase with the phase determined by the bioinformatic pipeline for indels

| Amplicon ID | Variant1 (GRCh38) | Variant2 (GRCh38) | Correct Phase | Phase determined by the bioinformatic pipeline |
| --- | --- | --- | --- | --- |
| A5 | chr1:236545243 CG>C | chr1:236559878 C>A | Cis | Cis |
| B2 | chr12:8928422 AC>A | chr12:8935310 ATAG>A | Cis | Cis |
| TUBB2B | chr6:3224393 A>ACG | chr6:3226966 T>G | Cis | Cis |
| B7 | chr21:42,378,870 TTTTG>T | chr21:42,388,818 A>G | Cis | Cis |
| B7 | chr21:42,371,516 G>A | chr21:42,383,199 C>CTA | Trans | Trans |
| A7 | chr1:6,629,764 A>G | chr1:6,639,213 AGTT>A | Trans | Trans |
| B3 | chr12: 6,936,728 ACAGCAG>A | chr12:6,944,269 C>T | Trans | Trans |
| B4 | chr4:41,642,717 C>CCTGG | chr4:41,650,276 C>G | Cis | Cis |
| A4 | chr6:152,394,892 T>TCTC | chr6:152,401,893 T>C | Trans | Trans |
| B10 | chr1: 236,017,572 G>GA | chr1:236,033,263 A>G | Cis | Cis |

### Table S17: Comparison of chimeric reads across three different PCR conditions

| Amplicon ID | Variant 1 (hg38) | Variant 2 (hg38) | Distance between variants (bp) | Chimeric reads % UltraRun (26 cycles) | Chimeric reads % UltraRun (28 cycles) | Chimeric reads % Platinum (26 cycles) |
| --- | --- | --- | --- | --- | --- | --- |
| A3 | chr1:154,579,450 C>T | chr1:154,585,209 C>T | 5759 | 4.25 | 7.81 | 9.48 |
| B2 | chr12:8,927,591 T>C | chr12:8,936,676 A>C | 9085 | 16.12 | 22.72 | 27.10 |
| B3 | chr12:6,936,914 G>A | chr12:6,944,269 C>T | 7355 | 3.03 | 2.86 | 9.97 |
| B4 | chr4:41,638,861 C>T | chr4:41,651,881 G>A | 13020 | 1.93 | 2.30 | 11.00 |
| B5 | chr3:49,412,205 G>A | chr3:49,425,854 G>A | 13649 | 2.62 | 2.82 | 8.57 |
| A5 | chr1:236,544,737 T>C | chr1:236,559,878 C>A | 15141 | 5.48 | 18.34 | 8.78 |
| A6 | chr1:43658540 G>T | chr1:43667233 A>G | 8693 | 2.24 | 5.30 | 2.13 |
| B8 | chr3:48,566,437 G>A | chr3:48,584,160 T>C | 17723 | 6.77 | 9.77 | 9.17 |
|  | | | **Mean** | 5.31 | 8.99 | 10.78 |
| **Median** | 3.64 | 6.56 | 9.33 |
| **SD** | 4.68 | 7.67 | 7.12 |

# Evaluating the relevance of the phasing test with 20kb limit

The effectiveness of the phasing test with a 20kb distance limit was evaluated on a curated panel of 5,678 genes associated with Mendelian disorders. This gene panel is called Mendeliome and includes a curated list of genes with established evidence of association with Mendelian disorders, therefore a good representation of genes that would need phasing in a clinical context.


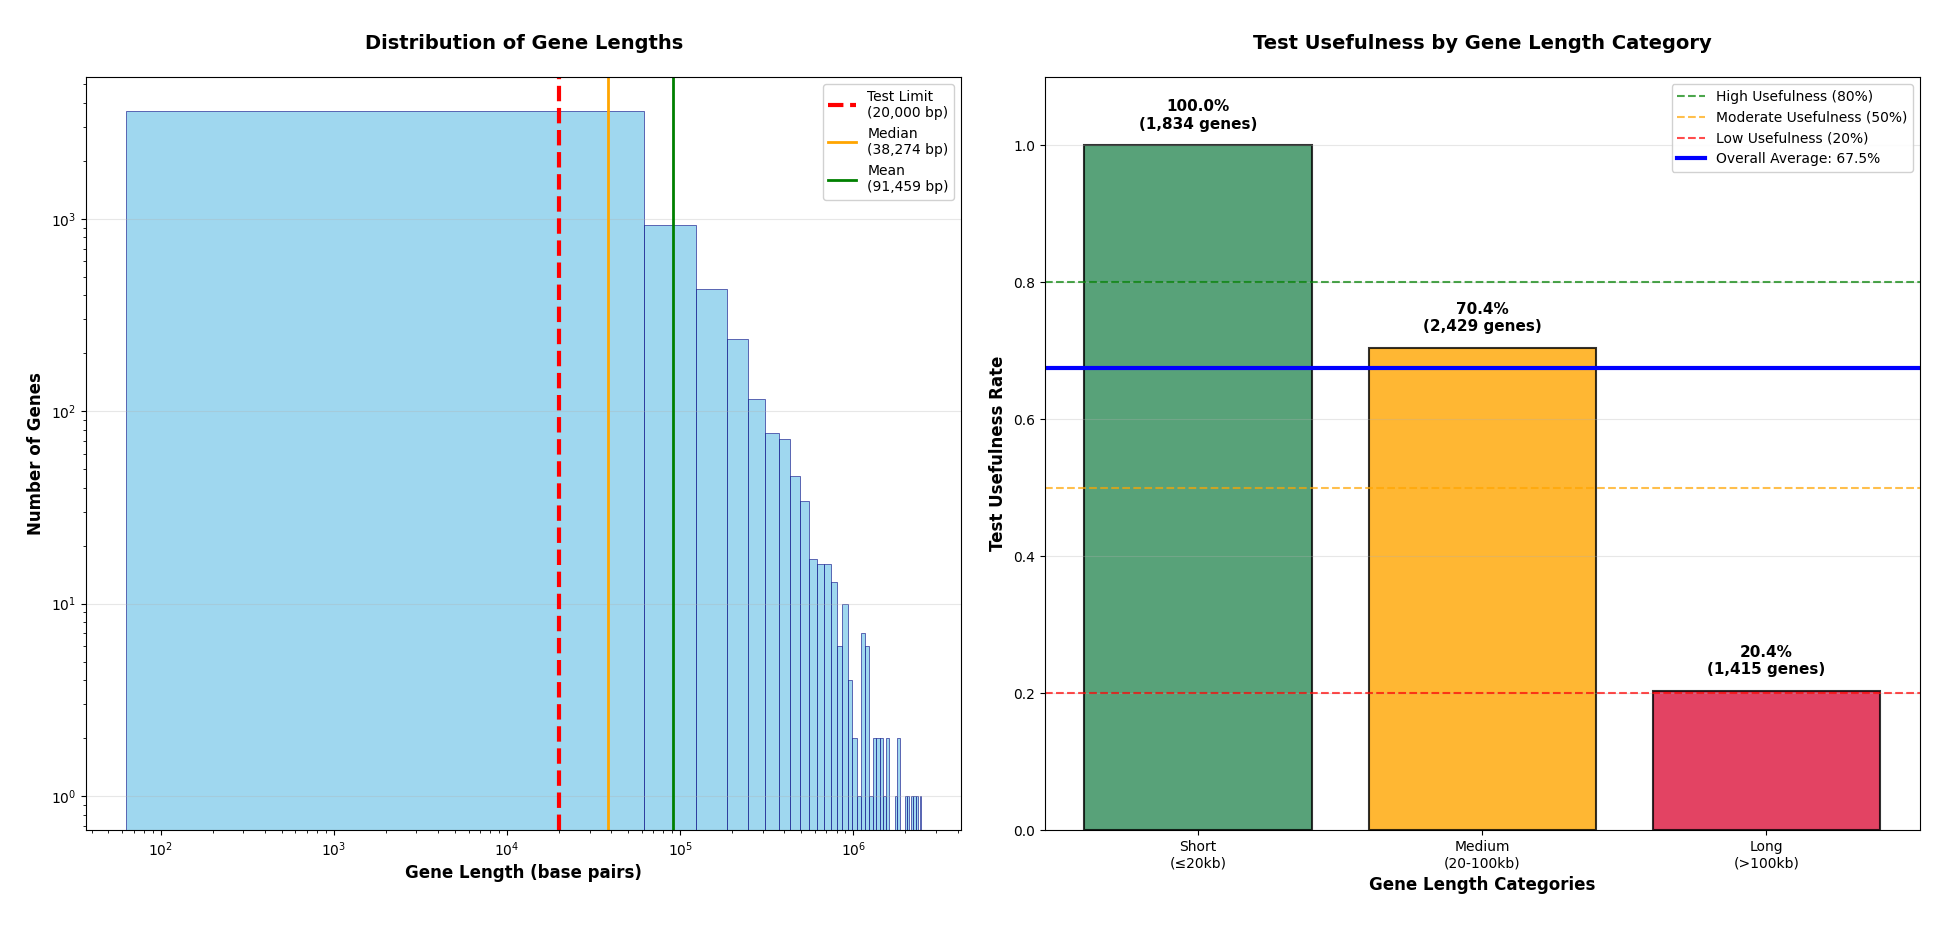
Overall, the expected relevance rate was 67.5% (95% CI: 66.7%-68.4%) across the entire gene set. This indicates that for any two random variants within a gene in this dataset, there is a ~68% chance they fall within the test's phasing range (20kb). The utility of the test is, however, highly dependent on gene size. For the 1,834 genes (32.3% of the panel) that are 20 kb or shorter, the test would be 100% effective. The median gene length in our dataset was 38,274 bp, for which the test maintains a high relevance rate of 77.2%. However, effectiveness would reduce for larger genes. For medium-sized genes (20-100kb), which comprise 42.8% of the panel, the average usefulness is 70.4%, which drops to 20.4% for long genes (>100kb). See figure S1 for a visualisation of the gene lengths distribution and the phasing test usefulness by gene lengths. In summary, the phasing test will be highly relevant for a significant portion of clinically relevant variant pairs need phasing, particularly in genes smaller than 100kb.

### Figure S1. Gene lengths distribution (left) in the database of 5,678 genes associated with Mendelian disorders and the phasing test usefulness by gene lengths (right).
